# Supplementary material for: Growth, mortality, and exploitation of Saurida lessepsianus Russell, Golani & Tikochinski, 2015, from a southern Aegean Sea small-scale fishery: a stock assessment for sustainable fisheries
Source: PeerJ. 2025 Aug 22;13:e19955. doi: 10.7717/peerj.19955 (PMC12377357; doi:10.7717/peerj.19955)
Supplement: Supplemental Information 1 [file peerj-13-19955-s001.xlsx]

## Sheet: Sayfa1
Length	weight	age
11.1	10.85	1
11.2	10.26	1
11.2	9.48	1
11.4	11.02	1
11.4	8.49	1
11.6	15.87	1
11.6	10.07	1
11.7	11.69	1
11.8	8.76	1
11.9	13.54	1
12	12.64	1
12	17.11	1
12	14.29	1
12.1	11.24	1
12.3	11.35	1
12.3	11.36	1
12.3	11.45	1
12.4	13.59	1
12.4	10.47	1
12.4	10.17	1
12.5	11.29	1
12.5	14.32	1
12.6	12.75	1
12.8	11.87	1
12.8	13.52	1
12.9	11.98	1
12.9	15.27	1
13	16.17	1
13	12.49	1
13	12.13	1
13.1	13.04	1
13.2	13.46	1
13.2	13.78	1
13.3	14.52	1
13.3	16.78	1
13.5	14.82	1
13.9	13.05	1
14	16.21	1
14.1	14.6	1
14.3	15.28	1
14.4	15.46	1
14.4	17.91	1
14.6	18.85	1
14.7	16.31	1
14.8	17.94	1
14.9	18.85	1
14.9	16.83	1
15	18.99	1
15	19.08	1
15.1	23.49	1
15.1	19.93	1
15.1	21.21	1
15.1	20.05	1
15.2	20.68	1
15.2	17.28	1
15.2	17.46	1
15.2	21.41	1
15.2	22.6	1
15.3	19.96	1
15.3	21.24	1
15.4	22.91	1
15.4	20.21	1
15.4	18.6	1
15.5	19.98	1
15.5	22.05	1
15.6	18.01	1
15.7	22.25	1
15.7	22.25	2
15.7	19.12	2
15.8	25.03	1
15.9	22.1	1
15.9	23.93	2
16	22.71	1
16	23.26	1
16	20.97	2
16.1	25.81	1
16.1	26.41	1
16.1	24.83	2
16.1016	27.01	1
16.2	23.4	1
16.2	24.88	1
16.2	25.78	2
16.2732	30.77	1
16.2757	33.89	2
16.3	22.7	1
16.3	25.62	1
16.3	25.02	2
16.3	23.21	2
16.4	21.55	1
16.4	25.89	1
16.4	28.2	1
16.4	26.78	1
16.4	25.23	2
16.5	23.97	1
16.5	25.19	1
16.5486	31.66	2
16.6	25.87	1
16.6	28.51	1
16.6	27.88	1
16.6	26.26	2
16.6	26.27	2
16.6	26.64	2
16.7	28.23	2
16.8	29.61	2
16.9	24.44	1
16.9	25.39	2
16.9	27.45	2
16.9	30.67	2
17	25.04	1
17	29.56	2
17	26.49	2
17	33.79	2
17	27.54	2
17.1	29.62	1
17.1	35.51	2
17.1	28.39	2
17.2	31.32	1
17.2	30.99	2
17.2	28.76	2
17.2	33.05	2
17.2	30.93	2
17.2	31.14	2
17.3	29.01	2
17.3	32.89	2
17.3155	32.01	2
17.4	34.21	2
17.4	30.6	2
17.4	31.19	2
17.5	30.26	1
17.5	31.01	2
17.5	29.89	2
17.5	32.27	2
17.5	36.43	2
17.5	36.97	2
17.5	31.81	2
17.5	30.62	2
17.5102	33.8	2
17.5315	29.33	2
17.6	31.5	2
17.6	34.17	2
17.6	32.96	2
17.7	31.97	2
17.7	30.72	2
17.7	36	2
17.7266	38.32	2
17.8	32.35	2
17.8	36.23	2
17.8	32.79	2
17.8	35.55	2
17.9	36.16	2
17.9	30.15	2
17.9	30.88	2
17.9	36.22	2
18	33.06	2
18	41.79	2
18	31.78	2
18	34.96	2
18	33.92	2
18	34.71	2
18	31.25	2
18	37.03	2
18	42.62	2
18.0258	76.14	2
18.1	37.79	2
18.1	32.13	2
18.1	33.9	2
18.1	34.03	2
18.1861	37.26	2
18.2	29.83	2
18.2	36.49	2
18.2	34.9	2
18.3	38.32	2
18.3	35.93	2
18.3	38.61	2
18.3	34.71	2
18.3	39.67	2
18.3	39.55	2
18.4	37.55	2
18.4	37.81	2
18.4	32.8	2
18.4	35.73	2
18.4	36.91	2
18.5	45.8	2
18.5	36.58	2
18.5	35.38	2
18.5	42.75	2
18.5	38.92	2
18.5	43.67	2
18.5	41.59	2
18.5	40.66	2
18.5	39.68	2
18.5	36.88	2
18.6	37.56	2
18.6	35.4	2
18.6	38.13	2
18.6	37.61	2
18.6149	41.35	2
18.7	39.03	2
18.7	34.61	2
18.7	40.73	2
18.7387	44.91	2
18.7621	50.48	2
18.8	41.79	2
18.8	35.57	2
18.8	42.79	2
18.8	39.62	2
18.8	36.95	2
18.8	39.97	2
18.8	40.01	2
18.9	29.32	2
18.9	39.89	2
18.9	44.11	2
18.9	39.49	2
18.9	41.19	2
18.9346	46.05	2
19	40.41	2
19	42.85	2
19	43.52	2
19	40.47	2
19	38.11	2
19	41.09	2
19	41.3	2
19	41.87	2
19	42.17	2
19.1	44.33	2
19.1	47.93	2
19.1	43.73	2
19.1	42.86	2
19.1	40.93	2
19.1	46.63	2
19.1	44.72	2
19.1	39.42	2
19.2	42.54	2
19.2	40.01	2
19.2	44.81	2
19.2	45.18	2
19.225	43.41	2
19.3	43.26	2
19.3	44.93	2
19.3	40.46	2
19.3	41.67	2
19.3	45.14	2
19.4	41.67	2
19.4	41.42	2
19.4	46.73	2
19.5	45.59	2
19.5	44.81	2
19.5	48.07	2
19.5	39.2	2
19.6	42.39	2
19.6	46.15	2
19.6	49.97	2
19.6	42.2	2
19.7	48.92	2
19.7	47.42	2
19.7	49.35	2
19.7	38.17	2
19.7	50.33	2
19.7	51.06	2
19.7	55.08	2
19.8	53.43	2
19.8	53.41	2
19.8	44.56	2
19.8	42.99	2
19.8	48.62	2
19.8	46.18	2
19.8	54.32	2
19.9	51.43	2
19.9	51.64	2
19.9	56.64	2
19.9	48.14	2
19.9	41.9	2
19.9088	49.56	2
20	45.33	2
20	47.83	2
20	46.22	2
20	45.88	2
20	39.94	2
20	61.83	2
20	50.36	2
20	53.27	2
20	46.98	2
20	46.3	2
20	55.55	2
20	39.97	2
20.0899	52.32	2
20.1	51.3	2
20.1	49.68	2
20.1	46.26	2
20.1	54.18	2
20.1	52.19	2
20.1	54.72	2
20.1	50.53	2
20.1	52.79	2
20.2	40.95	2
20.2	50.19	2
20.2	47.55	2
20.2	53.21	2
20.2	52.86	2
20.2	46.36	2
20.2	52.07	2
20.2	47.78	2
20.2087	51.09	2
20.3	54.64	2
20.3	48.68	2
20.3	55.71	2
20.3	59.16	2
20.3	51.65	2
20.3	40.46	2
20.3	49.91	2
20.3	44.96	2
20.3	56.54	2
20.3	46.87	2
20.4	53.43	2
20.4	52.61	2
20.4	52.2	2
20.4	64.23	2
20.4	50.43	2
20.4	52.92	2
20.4	61.91	2
20.4329	56.85	2
20.4676	57.12	2
20.5	52.81	2
20.5	56.22	2
20.5	50.38	2
20.5	67.16	2
20.5	70.49	2
20.5	57.4	2
20.5	48.16	2
20.6	50.47	2
20.6	52.13	2
20.6	52.61	2
20.6	53.1	2
20.6	53.89	2
20.6	56.13	2
20.6	62.55	2
20.6	57.31	2
20.6	50.4	2
20.6	50.38	2
20.6	51.99	2
20.6	56.56	2
20.6	61.28	2
20.7	52.11	2
20.7	55.04	2
20.7	53.83	2
20.7	54.08	2
20.7	52.87	2
20.7	58.53	2
20.7721	59.23	2
20.8	54.24	2
20.8	60.41	2
20.8	50.52	2
20.8	56	2
20.8	58.43	2
20.8	48.41	2
20.8	54.03	2
20.8	53.96	2
20.8	53.2	2
20.8	59.76	2
20.8	52.11	2
20.8	56.3	2
20.8	55.66	2
20.8	64.61	2
20.9	48.18	2
20.9	55	2
20.9	58.19	2
20.9	62.3	2
20.9	50.9	2
20.9	54.24	2
20.9	56.89	2
20.9	57.36	2
20.9	55.51	2
20.9	55.06	2
20.9	48.52	2
21	40.36	2
21	50.76	2
21	57.59	2
21	54.1	2
21	65.32	2
21	54.48	2
21	48.03	2
21	49.24	2
21	56.96	2
21	52.86	2
21	57.67	2
21	59.11	2
21	58.85	2
21	61.48	2
21	58.01	2
21	57.89	2
21	57.09	2
21	57.44	2
21	60	2
21	60.79	2
21	55.98	2
21	59.3	2
21	28.93	2
21	58.31	2
21	57.44	2
21.0792	58.75	2
21.1	53.97	2
21.1	57.81	2
21.1	58.64	2
21.1	61.92	2
21.1	67.62	2
21.1	77.76	2
21.1	55.12	2
21.1	55.31	2
21.1	65.33	2
21.1003	61.58	2
21.2	60.25	2
21.2	59.03	2
21.2	67.08	2
21.2	62.01	2
21.2	59.58	2
21.2	57.85	2
21.2	50.81	2
21.2	65.34	2
21.2	63.05	2
21.2674	59.61	2
21.3	56.54	2
21.3	59.29	2
21.3	54.4	2
21.3	58.17	2
21.3	63.56	2
21.3	55.64	2
21.3	61.16	2
21.3	49.98	2
21.3	62.86	2
21.3	61.46	2
21.3	65.21	2
21.3	62.83	2
21.3	57.72	2
21.3	53.37	2
21.3	63.83	2
21.3	51.33	2
21.3	64.9	2
21.3273	72.63	2
21.4	63.31	2
21.4	61.09	2
21.4	65.81	2
21.4	63.33	2
21.4	57.45	2
21.4	55.18	2
21.428	83.67	2
21.5	60.43	2
21.5	61.74	2
21.5	59.76	2
21.5	63.6	2
21.5	56.03	2
21.5	64.65	2
21.5	60.32	2
21.5	61.07	2
21.5	56.92	2
21.5	62.11	2
21.5	61	2
21.5	67.27	2
21.5	69.37	2
21.5	52.86	2
21.6	57.82	2
21.6	66.53	2
21.6	60.45	2
21.6	69.6	2
21.6	65.73	2
21.6	62.39	2
21.6	66.05	2
21.6	67.82	2
21.6	52.59	2
21.7	59.7	2
21.7	70.54	2
21.7	60.26	2
21.7	64.47	2
21.7	78.75	2
21.7	67.48	2
21.7	59.69	2
21.7	58.95	2
21.7	63.02	2
21.7	61.99	2
21.7	65.43	2
21.7	70.56	2
21.7	69.08	2
21.7	67.23	2
21.7	66.96	2
21.8	56.63	2
21.8	70.65	2
21.8	60.6	2
21.8	59.24	2
21.8	60.87	2
21.8	56.73	2
21.8	66.31	2
21.8	67.11	2
21.8	72.23	2
21.8	66.92	2
21.8	61.93	2
21.8	59.59	2
21.8	62.76	2
21.8	63.03	2
21.8216	59.84	2
21.9	62.89	2
21.9	66.98	2
21.9	64.88	2
21.9	59.28	2
21.9	71.56	2
21.9	65.24	2
21.9717	66.79	2
22	61.44	2
22	68.05	2
22	67.32	2
22	68.51	2
22	69.86	2
22	66.02	2
22	70.95	2
22	68.24	2
22	64.79	2
22	62.8	2
22	60.56	2
22	60.69	2
22	68.14	2
22	59.52	2
22	63.47	2
22	75.34	2
22	71.68	2
22	61.87	2
22	67.49	2
22	68.55	2
22	60.14	3
22.1	70.18	2
22.1	60.47	2
22.1	63.88	2
22.1	63.9	2
22.1	62.82	2
22.1	64	2
22.1	63.88	2
22.1	68.11	2
22.1	59.15	2
22.1	69.8	2
22.1	68.7	2
22.1	68.23	2
22.1	68.26	2
22.1	64.02	2
22.1295	62.26	2
22.2	73.75	2
22.2	68.77	2
22.2	66.74	2
22.2	72.68	2
22.2	72.31	2
22.2	63.39	2
22.2	59.83	2
22.2	68.76	2
22.2	62.81	2
22.2	66.2	2
22.2	64.27	2
22.2	68.17	2
22.2	70.65	2
22.2	68.54	2
22.3	70.99	2
22.3	66.41	2
22.3	82.78	2
22.3	60.61	2
22.3	76.23	2
22.3	76.89	2
22.3	66.76	2
22.3	71.08	2
22.3115	78.87	2
22.4	57.09	2
22.4	66.15	2
22.4	66.35	2
22.4	66.09	2
22.4	71.98	2
22.4	66.1	2
22.4	69.47	2
22.4	92.75	2
22.4949	71.57	2
22.5	65.86	2
22.5	63.46	2
22.5	70.42	2
22.5	77.23	2
22.5	68.89	2
22.5	66.36	2
22.5	79.36	2
22.5	64.23	2
22.5	74.08	2
22.5	72.56	2
22.5	85.52	2
22.5	81.11	2
22.5	75.56	3
22.5	72.41	3
22.5	65.57	3
22.5	69.58	3
22.5	73.96	3
22.5556	86.99	2
22.6	69.23	2
22.6	71.94	2
22.6	67.29	2
22.6	67.1	2
22.6	67.31	2
22.6	75.13	2
22.6	77.11	2
22.6	66.17	3
22.6	71.28	3
22.6	74.54	3
22.6	65.12	3
22.6	67.12	3
22.6	84.5	3
22.7	67.36	2
22.7	76.85	2
22.7	76.42	2
22.7	79.37	2
22.7	83.74	3
22.7	70.71	3
22.7	73.75	3
22.7	69.72	3
22.7	64.26	3
22.7	57.71	3
22.7	74.53	3
22.7	78.29	3
22.7	74.68	3
22.7	58.55	3
22.7993	76.27	3
22.8	75.66	2
22.8	76.54	2
22.8	70.29	2
22.8	78.88	2
22.8	73.96	2
22.8	68.87	3
22.8	77.83	3
22.8	76.67	3
22.8	69.06	3
22.8	82.2	3
22.8	68.51	3
22.8	89.14	3
22.8432	87.2	3
22.8516	99.34	3
22.8874	93.67	3
22.8881	70.66	3
22.9	82.94	2
22.9	91.31	2
22.9	55.96	2
22.9	63.28	2
22.9	74.31	3
22.9	81	3
22.9	72.69	3
22.9	84.57	3
23	73.86	2
23	81.09	2
23	79.16	2
23	79.2	3
23	67.23	3
23	66.93	3
23	65.08	3
23	69.88	3
23.0234	79.08	3
23.0444	78.49	3
23.1	78.17	2
23.1	87.22	3
23.1	70.87	3
23.1	84.21	3
23.1	72.26	3
23.1	75.93	3
23.1	88.76	3
23.1	71.94	3
23.1	67.55	3
23.1262	83.16	3
23.2	71.26	3
23.2	71.47	3
23.2	82.74	3
23.2	84.64	3
23.2	79.43	3
23.2	76.11	3
23.2867	84.67	3
23.3	88.34	2
23.3	88.2	3
23.3	76.16	3
23.3	59.58	3
23.3	76.37	3
23.4	71.53	2
23.4	89.02	2
23.4	83.41	2
23.4	78.93	3
23.4	75.47	3
23.4	75.56	3
23.4	76.31	3
23.4	77.24	3
23.4085	95.16	3
23.4672	88.66	3
23.5	71.98	2
23.5	103.12	3
23.5	88.37	3
23.5	58.5	3
23.5	85.81	3
23.5	88.16	3
23.5	81.01	3
23.5	88.42	3
23.5	78.56	3
23.6	81.01	3
23.6	78.15	3
23.7	80.47	2
23.7	84.75	3
23.7	80.83	3
23.7	80.46	3
23.7	76.77	3
23.7	77.73	3
23.7	78.36	3
23.7	87	3
23.7	85.5	3
23.7	74.49	3
23.8	83.26	2
23.8	89.86	3
23.8	77.09	3
23.8	76.2	3
23.8	84.08	3
23.8	99.29	3
23.8	99.1	3
23.8	87.4	3
23.8	96.35	3
23.8	92.53	3
23.8212	99.39	3
23.9	139.51	3
23.9	82.67	3
23.9	85.11	3
23.9	85.78	3
23.9	81.17	3
23.9	85.53	3
23.9	87.08	3
23.9597	100.1	3
24	87.11	3
24	94.86	3
24	85	3
24	87.61	3
24	98.77	3
24	73.37	3
24	81.75	3
24	88.7	3
24	78.57	3
24	81.02	3
24	85.34	3
24	81.01	3
24	75.69	3
24	96.68	3
24.1	87.93	3
24.1	80.74	3
24.1	79.06	3
24.1	91.72	3
24.1	86.98	3
24.1	89.51	3
24.1	94.26	3
24.1	92.6	3
24.1913	91.94	3
24.2	84.45	3
24.2	94.93	3
24.2	78.59	3
24.2	79.05	3
24.2	81.81	3
24.2	92.21	3
24.3	92.69	3
24.3	90.1	3
24.3	88.2	3
24.3	99.93	3
24.3	75.48	3
24.3	85.21	3
24.3	83.43	3
24.3	90.78	3
24.3	98.86	3
24.326	101.67	3
24.3659	90.7	3
24.4	80.76	3
24.4	113.79	3
24.4	92.36	3
24.4	85.94	3
24.4	88.11	3
24.4	88.51	3
24.4	92.3	3
24.4	90.02	3
24.4	75.67	3
24.4	94.04	3
24.4	81.33	3
24.4	89.09	3
24.4	95.23	3
24.4	116.05	3
24.4	99.73	3
24.4	105.76	3
24.5	98.31	3
24.5	87.03	3
24.5	104.18	3
24.5	91.04	3
24.5	80.17	3
24.5	91.83	3
24.5	93.52	3
24.5	82.81	3
24.5	85	3
24.5	109.29	3
24.5	101.33	3
24.5	91.09	3
24.5	113.65	3
24.5	101.06	3
24.5655	92.86	3
24.6	101.89	3
24.6	96.55	3
24.6	100.91	3
24.6	100.89	3
24.6	86.9	3
24.6	101.91	3
24.6	84.12	3
24.6186	92.8	3
24.6232	107.92	3
24.7	95.25	3
24.7	94.84	3
24.7	94.72	3
24.7	92.88	3
24.7	91.27	3
24.7	96.67	3
24.7	111.86	3
24.7	116.32	3
24.7	116.12	3
24.7	105.26	3
24.7287	94.27	3
24.8	95.5	3
24.8	84.23	3
24.8	88.07	3
24.8	95.73	3
24.8	95.46	3
24.8013	93.6	3
24.9	95.83	3
24.9	98.07	3
24.9	93.26	3
24.9	98.67	3
24.9	99.35	3
24.9	106.87	3
24.9	97.76	3
24.9	105.11	3
24.9	90.59	3
24.9	99.38	3
24.9	108.69	3
24.9361	109.46	3
25	111.62	3
25	96.75	3
25	95.08	3
25	114.09	3
25	99.58	3
25	109.12	3
25	89.5	3
25	106.66	3
25	102.32	3
25	88.72	3
25	96.53	3
25	99.72	3
25	97.17	3
25	93.67	3
25	115.51	3
25.0978	103.09	3
25.0991	108.98	3
25.1	95.59	3
25.1	78.94	3
25.1	90.21	3
25.1	101.52	3
25.1	94.56	3
25.1	104.65	3
25.1	78.98	3
25.1	106.66	3
25.1025	93.4	3
25.2	103.61	3
25.2	94.54	3
25.2	107.88	3
25.2	102.23	3
25.2	86.08	3
25.2	116.19	3
25.2	96.99	3
25.2	94.83	3
25.2	108.33	3
25.2	107.03	3
25.2309	108.78	3
25.3	90.67	3
25.3	108.24	3
25.3	102.01	3
25.3	106.25	3
25.3	108.29	3
25.3	105.22	3
25.3	85.61	3
25.3	100	3
25.3	93.65	3
25.3	98.51	3
25.3	103.67	3
25.345	116.94	3
25.4	107.59	3
25.4	106.98	3
25.4	114.24	3
25.4	111.27	3
25.5	103.61	3
25.5	99.36	3
25.5	108.37	3
25.5	98.76	3
25.5	97.6	3
25.5	98.44	3
25.5	109.06	3
25.5	103.25	3
25.5	102.27	3
25.5	102.79	3
25.5	96.41	3
25.5	91.91	3
25.5	91.5	3
25.5	101.99	3
25.5	101.62	3
25.5	107.05	3
25.547	105.14	3
25.5743	117.37	3
25.6	116.06	3
25.6	102.34	3
25.6	115.59	3
25.6	109.54	3
25.6	98.45	3
25.652	113.74	3
25.7	119.11	3
25.7	106.57	3
25.7	114.43	3
25.7	123.46	3
25.7	121.32	3
25.7	119.26	3
25.8	86.63	3
25.8	110.98	3
25.8	124.56	3
25.9	152.76	3
25.9	95.57	3
25.9	136.47	3
25.9	106.1	3
25.9	105.11	3
25.9	142.42	3
25.9	134.11	3
25.9	108.38	3
25.9199	127.19	3
25.9752	96.28	3
26	124.59	3
26	109.28	3
26	108.14	3
26	104.62	3
26	114.38	3
26	104.33	3
26	105.6	3
26	115.63	3
26	115.59	3
26	119	3
26	121.71	3
26.028	127.13	3
26.1	115.67	3
26.1	102.39	3
26.1	122.22	3
26.1	111.05	3
26.1	124.05	3
26.1	104.34	3
26.1	104.48	3
26.1	118.87	3
26.1	114.4	3
26.1	113.66	3
26.1	150.7	3
26.1	116.67	3
26.1	121.98	3
26.1	110.86	4
26.1	112.99	4
26.2	111.61	3
26.2	178.5	3
26.2	104.53	3
26.2	114.2	3
26.2	122.79	3
26.222	120.14	3
26.2459	112.75	3
26.2769	114.45	3
26.3	116.13	3
26.3	130.47	3
26.3	111.91	3
26.3	131.85	3
26.3	113.83	3
26.4	116.71	3
26.4	126.09	3
26.4	153.57	3
26.4	108.61	3
26.4	107.86	3
26.5	128.87	3
26.5	120.66	3
26.5	104.03	3
26.5	111.05	3
26.5	103.73	3
26.5	106.91	3
26.5	130.07	3
26.5	123.26	3
26.5	100.41	3
26.5	152	3
26.5	113.21	3
26.5	113.89	3
26.5	126	3
26.5	156.14	3
26.5	116.41	3
26.5101	99.49	3
26.526	131.79	3
26.531	111.9	3
26.5399	130.11	3
26.6	119.29	3
26.6	122.02	3
26.6	101.21	3
26.6	112.79	3
26.6	119.97	3
26.6	171.15	3
26.6	110.27	3
26.6	158.33	3
26.7	124.55	3
26.7	121.33	3
26.7	103.83	3
26.7	105.2	3
26.7	117.53	3
26.7639	124.62	3
26.7645	123.35	3
26.7818	120.8	3
26.8	122.24	3
26.8	123.62	3
26.8	124.45	3
26.8	121.83	3
26.8	129.29	3
26.8	143.17	3
26.8	114.84	3
26.8	120.75	3
26.8	112.97	4
26.9	119.36	3
26.9	139.24	3
26.9	114.32	3
26.9	124.53	3
26.9	113.76	3
26.9	129.88	3
26.9	138.78	3
26.9	123.15	4
27	124.75	3
27	119.99	3
27	135.04	3
27	135.15	3
27	119.39	3
27	115.69	3
27	117.8	3
27	144.71	3
27	126.95	3
27.1	132.54	3
27.1	114.51	3
27.1	133.35	3
27.1	131.14	3
27.1	119.99	3
27.1	122.99	3
27.1	139.76	3
27.1	132.69	3
27.1501	158.97	3
27.2	145.14	3
27.2	142.05	3
27.2	136.49	3
27.2	119.22	3
27.2	114.28	3
27.2124	109.96	4
27.3	123.93	3
27.3	135.8	3
27.3	110.25	3
27.3	129.11	3
27.3	140.85	3
27.3	125.55	3
27.3426	158.59	3
27.4	135.92	3
27.4	152.45	3
27.4	123.87	3
27.4	126.06	3
27.4	101.2	3
27.4	123.07	3
27.4	124.75	3
27.4	123.61	3
27.4	141.95	3
27.4	135.91	3
27.4	154.63	4
27.4	126.03	4
27.4	127.88	4
27.4635	176.81	4
27.5	125.63	3
27.5	126.34	3
27.5	178.56	3
27.5	124.12	3
27.5	131.51	3
27.5	135.57	4
27.5	125.11	4
27.5	137.1	4
27.5	128.57	4
27.5291	142.16	3
27.6	165.78	3
27.6	127.98	3
27.6	117.87	4
27.6	163.96	4
27.6	133.04	4
27.6	151.04	4
27.6	135.58	4
27.6	162.25	4
27.6	163.27	4
27.7	148.75	3
27.7	158.67	3
27.7	132.26	4
27.7	131.51	4
27.7	139	4
27.7	152.33	4
27.7	143.33	4
27.8	132.93	3
27.8	127.22	3
27.8	121.39	3
27.8	119.95	4
27.8	95.73	4
27.8	161.82	4
27.8	123.89	4
27.9	166.98	3
27.9	132.72	4
27.9	135.97	4
27.9	129.17	4
27.9	167.46	4
27.9	125.4	4
27.9	142.98	4
27.9199	137.16	4
28	127.35	3
28	160.18	3
28	188.84	4
28	129.5	4
28	134.52	4
28	187.46	4
28	149.66	4
28	136.64	4
28	129.72	4
28	128.74	4
28.1	152.6	4
28.1	166.74	4
28.1	146.71	4
28.1	145.29	4
28.1	140.53	4
28.1	159.33	4
28.1	149.45	4
28.1	174.7	4
28.1	135.27	4
28.1	149.16	4
28.2	133.04	3
28.2	110.11	4
28.2	157.94	4
28.2	120.41	4
28.2	135.96	4
28.2	150.42	4
28.2104	141.67	3
28.3	148.99	4
28.3	147.14	4
28.3	137.45	4
28.3	162.53	4
28.3	187.93	4
28.3	166.55	4
28.3	143.86	4
28.3699	177.71	4
28.4	145.75	3
28.4	151.55	4
28.4	155.42	4
28.4	149.03	4
28.4	184.01	4
28.4	137.91	4
28.4	161.82	4
28.4	134.23	4
28.5	140.83	3
28.5	153.66	3
28.5	142.94	3
28.5	144.65	4
28.5	159.77	4
28.5	136.13	4
28.5	138.86	4
28.5	162.14	4
28.5	153.48	4
28.5	149.11	4
28.5856	155.35	4
28.6	139.94	3
28.6	152.05	4
28.6	189.48	4
28.6	193.62	4
28.6	147.26	4
28.6	147.62	4
28.7	147.7	3
28.7	182.57	4
28.7	154.94	4
28.7	150.48	4
28.7	150.19	4
28.7	153.72	4
28.7	158.15	4
28.7	128.84	4
28.7	153.48	4
28.8	140.53	3
28.8	146.23	4
28.8	156.87	4
28.8	144.93	4
28.8	151.59	4
28.8	168.19	4
28.8	161.21	4
28.8	151.68	4
28.9	164.97	4
28.9	140.97	4
28.9	153.28	4
28.9	147.33	4
29	170.98	3
29	143.91	4
29	158.37	4
29	181.49	4
29	164.37	4
29	152.94	4
29	172.45	4
29	147.74	4
29.1	153.98	3
29.1	203.47	4
29.1	166.35	4
29.1	175.75	4
29.1428	164.59	4
29.2	176.7	4
29.2	148.54	4
29.3	196.25	4
29.3	163.22	4
29.3	197.65	4
29.3	146.02	4
29.3	159.01	4
29.3	180.39	4
29.3	166.36	4
29.3	185.75	4
29.4	122.85	3
29.4	160.53	4
29.4	155.03	4
29.4	146.39	4
29.4	164.15	4
29.5	178.48	4
29.5	155.12	4
29.5	185.38	4
29.5	160.01	4
29.6	150.65	4
29.6	162.9	4
29.6	186.35	4
29.6	165.46	4
29.6	174.93	4
29.6	153.6	4
29.6	207.46	4
29.6	121.67	4
29.6	174.43	4
29.6	217.68	4
29.7	173.11	4
29.7	196.17	4
29.7	175.52	4
29.7	187.48	4
29.7	190.15	4
29.8	245.28	4
29.8	174.5	4
29.8	154.5	4
29.8	175.25	4
29.8	160.38	4
29.8	170.91	4
29.8	168.61	4
29.8	166.23	4
29.8	174.95	4
29.9	156.45	4
29.9	163.72	4
29.9	182.77	4
29.9	205.57	4
30	187.68	4
30	88.83	4
30	163.24	4
30	225.98	4
30	168.65	4
30	164.83	4
30	160.62	4
30	177.27	4
30	172.21	4
30	167.08	4
30	152.81	4
30	162.2	4
30	149.27	4
30	204.6	4
30.0061	169.06	4
30.1	148.69	4
30.1	171.9	4
30.1	157.43	4
30.1	156.13	4
30.2	229.93	4
30.2	167.09	4
30.2	179.05	4
30.2	188.09	4
30.2	190.92	4
30.2	187.78	4
30.2	164.84	4
30.3	179.68	4
30.3	204.33	4
30.3	169.76	4
30.3	173.65	4
30.3	156.65	4
30.3	226.37	4
30.3	188.01	4
30.4	190.95	4
30.4	171.18	4
30.4	192.22	4
30.4	168.63	4
30.4	177.58	4
30.4	185.04	4
30.5	183.92	4
30.5	193.04	4
30.5	170.86	4
30.5	181.32	4
30.6	179.56	4
30.7	177.6	4
30.7	176.15	4
30.7	163.19	4
30.7	188	4
30.7	179.68	4
30.8	174.49	4
30.8	227.75	4
30.8	176.17	4
30.8	234.85	4
30.8	197.13	4
30.9	184.7	4
30.9	185.57	4
30.9	184.25	4
31	219.62	4
31	172.24	4
31	175.91	4
31	194.82	4
31	225.97	4
31	243.55	4
31	191.53	4
31.0127	209.42	4
31.1	195.3	4
31.1	209.36	4
31.1	190.11	4
31.1	228.13	4
31.1	246.88	5
31.2	221.16	4
31.2	182.71	4
31.2	174.1	4
31.3	223.71	4
31.3	202.1	4
31.4	178.45	4
31.5	207.21	4
31.5	218.08	4
31.5	200.54	4
31.6	271.76	4
31.6	199.38	4
31.7	214.19	4
31.7	201.38	4
31.7	205.62	4
31.7	231.21	4
31.7	228.17	5
31.8	190.56	4
31.9	261.98	4
32	244.86	4
32	211.56	4
32	196.12	5
32	292.81	5
32.2	234.99	5
32.2	215.02	5
32.3	204.69	5
32.4	211.73	5
32.5	228.31	4
32.5	199.3	5
32.5	246.07	5
32.6	233.24	5
32.6	195.24	5
32.7	265.63	5
32.7	206.86	5
32.8	227.9	4
32.8	223.74	5
32.9	247.83	5
33	245.07	5
33	315.68	5
33.1	224.87	5
33.2	214.03	5
33.2	228.99	5
33.3	211.14	4
33.3	195.14	5
33.3	252.92	5
33.3	255.28	5
33.4	278.97	5
33.5	288.27	5
33.6	271.78	4
33.6	234.29	5
33.6	305.04	5
33.6	222.03	5
33.7	246.37	5
33.8	308.01	5
33.8	270.1	5
33.9	323.83	5
33.9	276.97	5
34	274.4	5
34	279.06	5
34	188.05	5
34	262.46	5
34.1	261.88	5
34.2	233.97	5
34.3	203.54	5
34.4	256.9	5
34.6	231.96	5
34.6	297.27	5
34.7	292.84	5
34.9	292.59	5
35.5	242.51	5
38.5	432.86	5
